# Supplementary material
Source: HighWire-hosted journal article supplement (doi:10.1101/rna.080638.125)
Supplement: Supplemental_Information.pdf [file Supplemental_Information.pdf]

## Supplemental Information

### Distribution and structural diversity of Type IV internal ribosome entry sites

Katherine E. Segar, Madeline E. Sherlock & Jeffrey S. Kieft

#### **Supplemental information contents:**

**Supplemental Figure S1:** Conservation of key rRNA and translation initiation factor sequences in vertebrates.

**Supplemental Figure S2:** Chemical probing of domain II.

**Supplemental Figure S3:** Sub-grouping of structurally similar Type IV IRESs using cluster analysis.

**Supplemental Figure S4:** Additional data on sub-groups secondary structural features.

**Supplemental Figure S5:** Cluster consensus/covariation models.

**Supplemental Figure S6:** Functional data on putative IRESs in *in vitro* mammalian systems.

**Supplemental Figure S7:** Raw luciferase values for in vitro translation assays.

**Supplemental Table S1:** Sequences discarded from the covariation and clustering analysis.

**Supplemental Table S2:** Taxonomic information on viral family and host class between Clusters.

**Supplemental Table S3:** DNA oligonucleotide sequences used in this study.

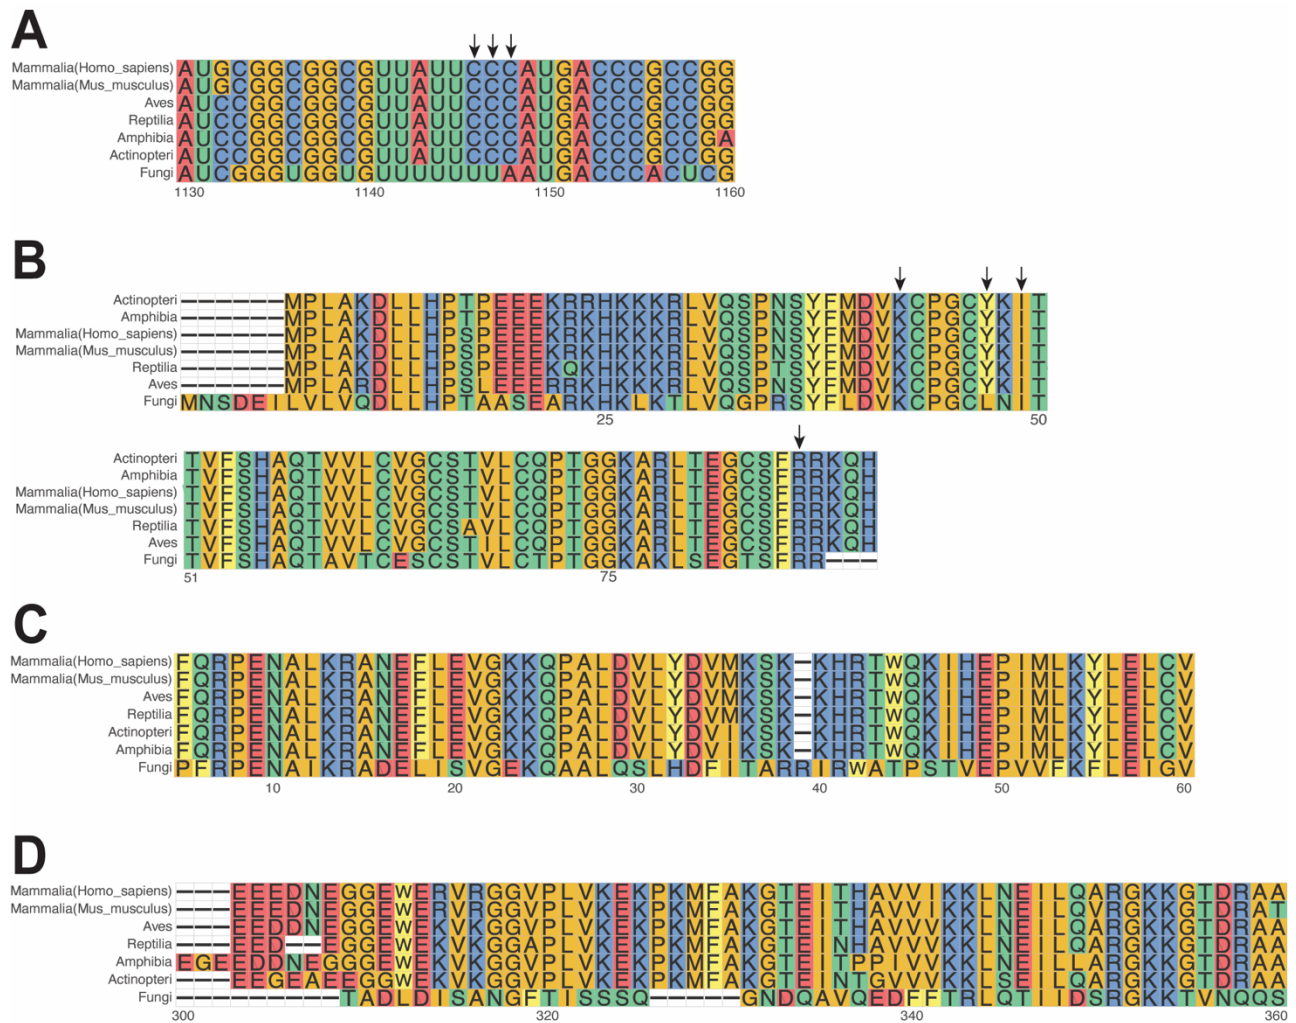

**Figure S1. Conservation of key rRNA and translation initiation factor sequences in vertebrates.** (A) Alignment of 18S rRNA sequences focused on expansion segment 7 across representative vertebrate examples. Arrows show conserved 'CCC' motif. Nucleotides are colored by identity. (B) Alignment of ribosomal protein eS27 across representative vertebrate examples. Arrows show residues that are implicated in HCV IRES interaction (*Quade. et al. 2015*). (C) Alignment of eIF3A N-terminal region, containing helix-loop-helix motif that is suggested to directly bind the HCV IRES (*Sun et al. 2013*). (D) Alignment of eIF3C helix-loop-helix motif that is suggested to directly bind the HCV IRES (*Sun et al. 2013*).

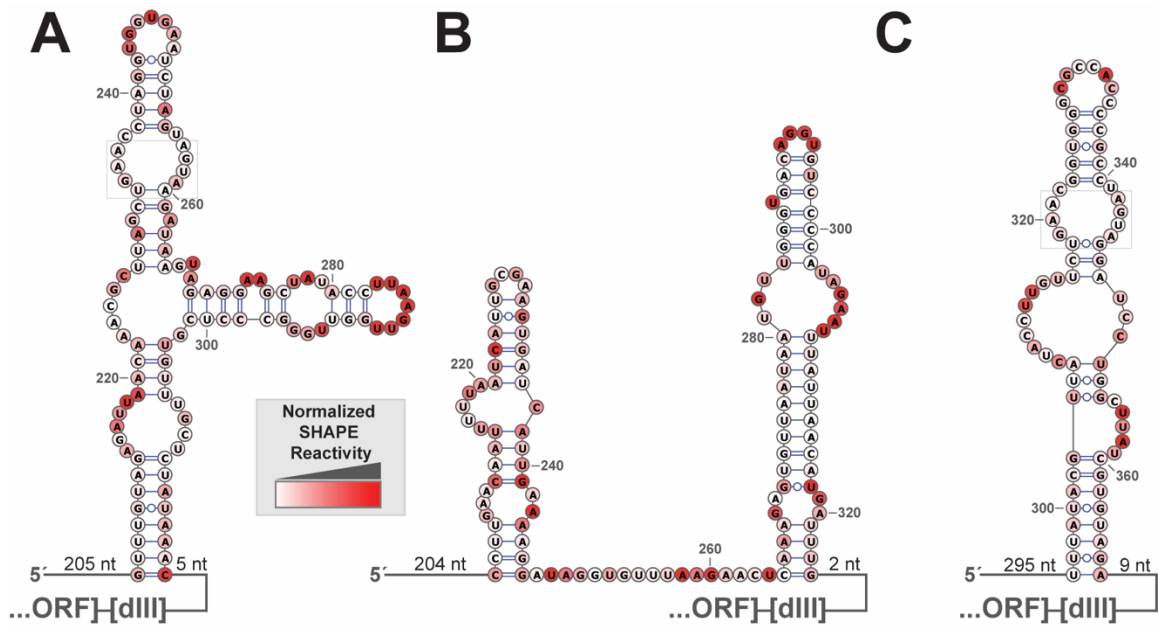

**Figure S2. Chemical probing of domain II.** Chemical probing results mapped onto secondary structure of domain II from different IRESs: **(A)** hepatovirus C (NC\_038313:206-318), **(B)** limnipivirus C (NC\_039212:205-324), and **(C)** megrivirus E (NC\_039004:295-366). The color of each nucleotide indicates how reactive it was to the probing agent, from low reactivity (white) to high (red). Domain II secondary structure for hepatovirus C and limnipivirus C was predicted with chemical probing data and sequence using the RNAprobing Webserver (Hofacker 2003; Deigan et al. 2009; Zarringhalam et al. 2012). Domain II secondary structure for megrivirus E was pulled directly from the alignment. The number of nucleotides upstream of domain II and between domain II and domain III are indicated. Loop E motifs are boxed in gray.

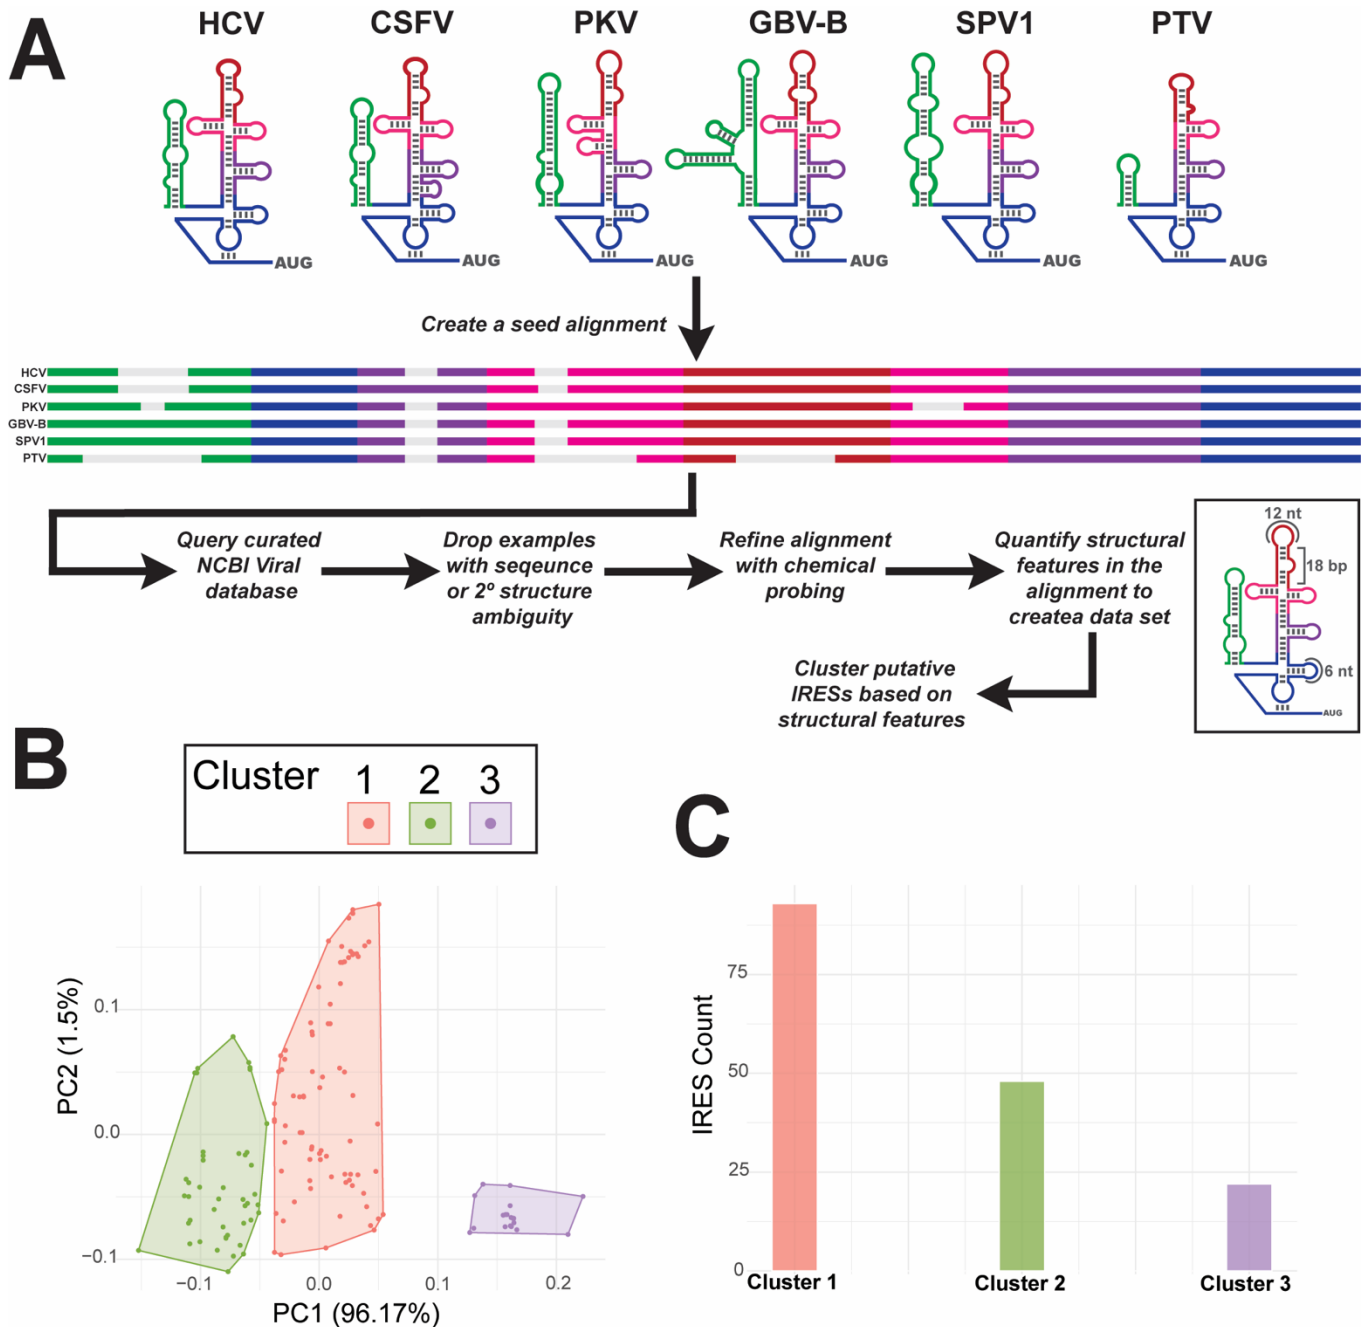

**Figure S3. Sub-grouping of structurally similar Type IV IRESs using cluster analysis. (A)** Workflow showing generation of the data set for analysis. Six Type IV IRESs were aligned based on secondary structure and important sequence features to create a seed alignment. The seed was used to search a curated NCBI database, limited to roughly one example per viral species. Of the 176 hits, 13 were dropped due to structure or sequence ambiguity. Chemical probing data on a diverse selection of putative IRESs was used to further refine the alignment. Subdomain features (i.e. stems and loops) were quantified using custom python scripts, which counted the number of base pairs or nucleotides present in a feature for each IRES. This dataset detailing structural features for each IRES was then used for clustering analysis. **(B)** Principal component analysis (PCA) plot of clustering results. Data was clustered into 3 groups using the CLARA algorithm (detailed in Methods). The first two principal components (PC1 and PC2), computed via PCA, are shown on the x- and y-axes. Each point represents an individual data observation, and colors indicate the assigned cluster membership. Convex hulls enclose points belonging to the same cluster for visualization purposes. **(C)** Graphical representation of the number of IRESs in each subgroup.

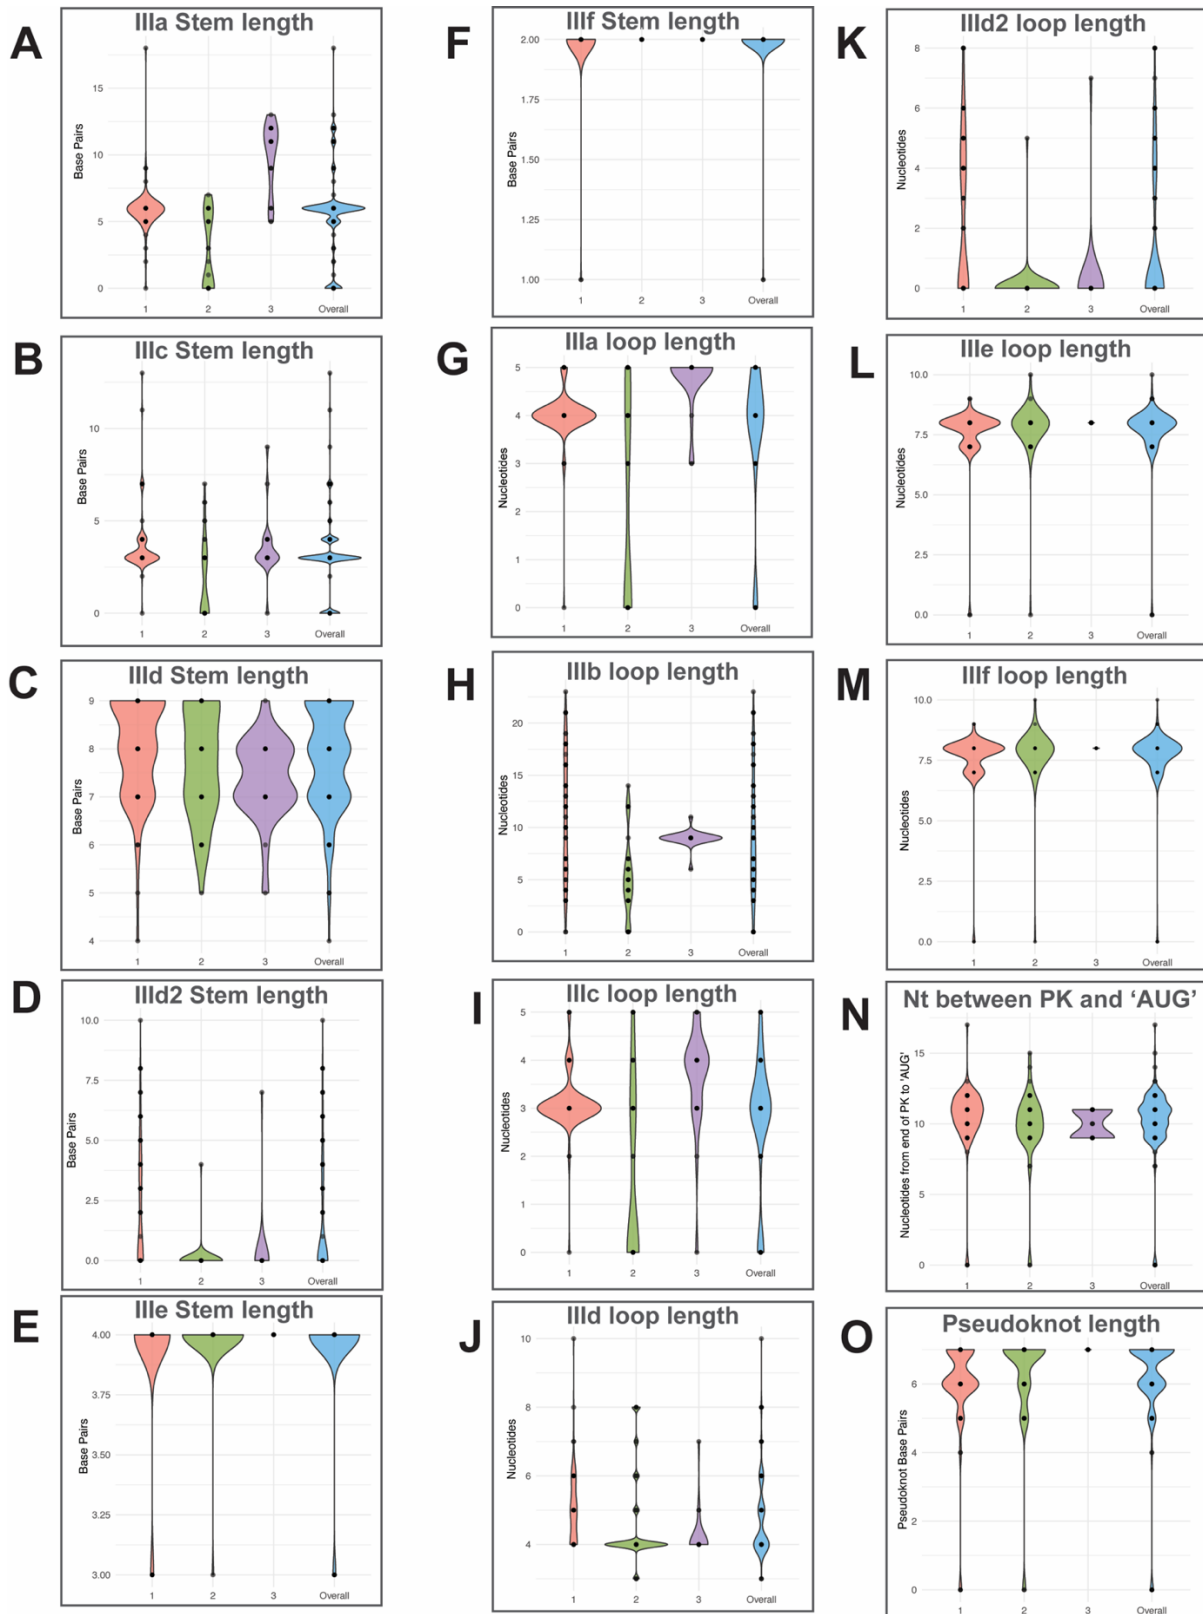

**Figure S4. Additional data on sub-groups secondary structural features.** Violin plots of the distribution of sub-domain stem lengths as measured in base pairs: (A) Illa, (B) IIIc, (C) IIIb, (D) IIIe, (E) IIIe, (F) IIIf. Violin plots of distribution of sub-domain loop lengths as measured in nucleotides: (G) Illa, (H) IIIb, (I) IIIc, (J) IIIb, (K) IIIe2, (L) IIIe, (M) IIIf. (N) Violin plot of distribution of nucleotides between the end of the pseudoknot and the start codon (AUG). (O) Violin plot of distribution of pseudoknot length as measured in base pairs.

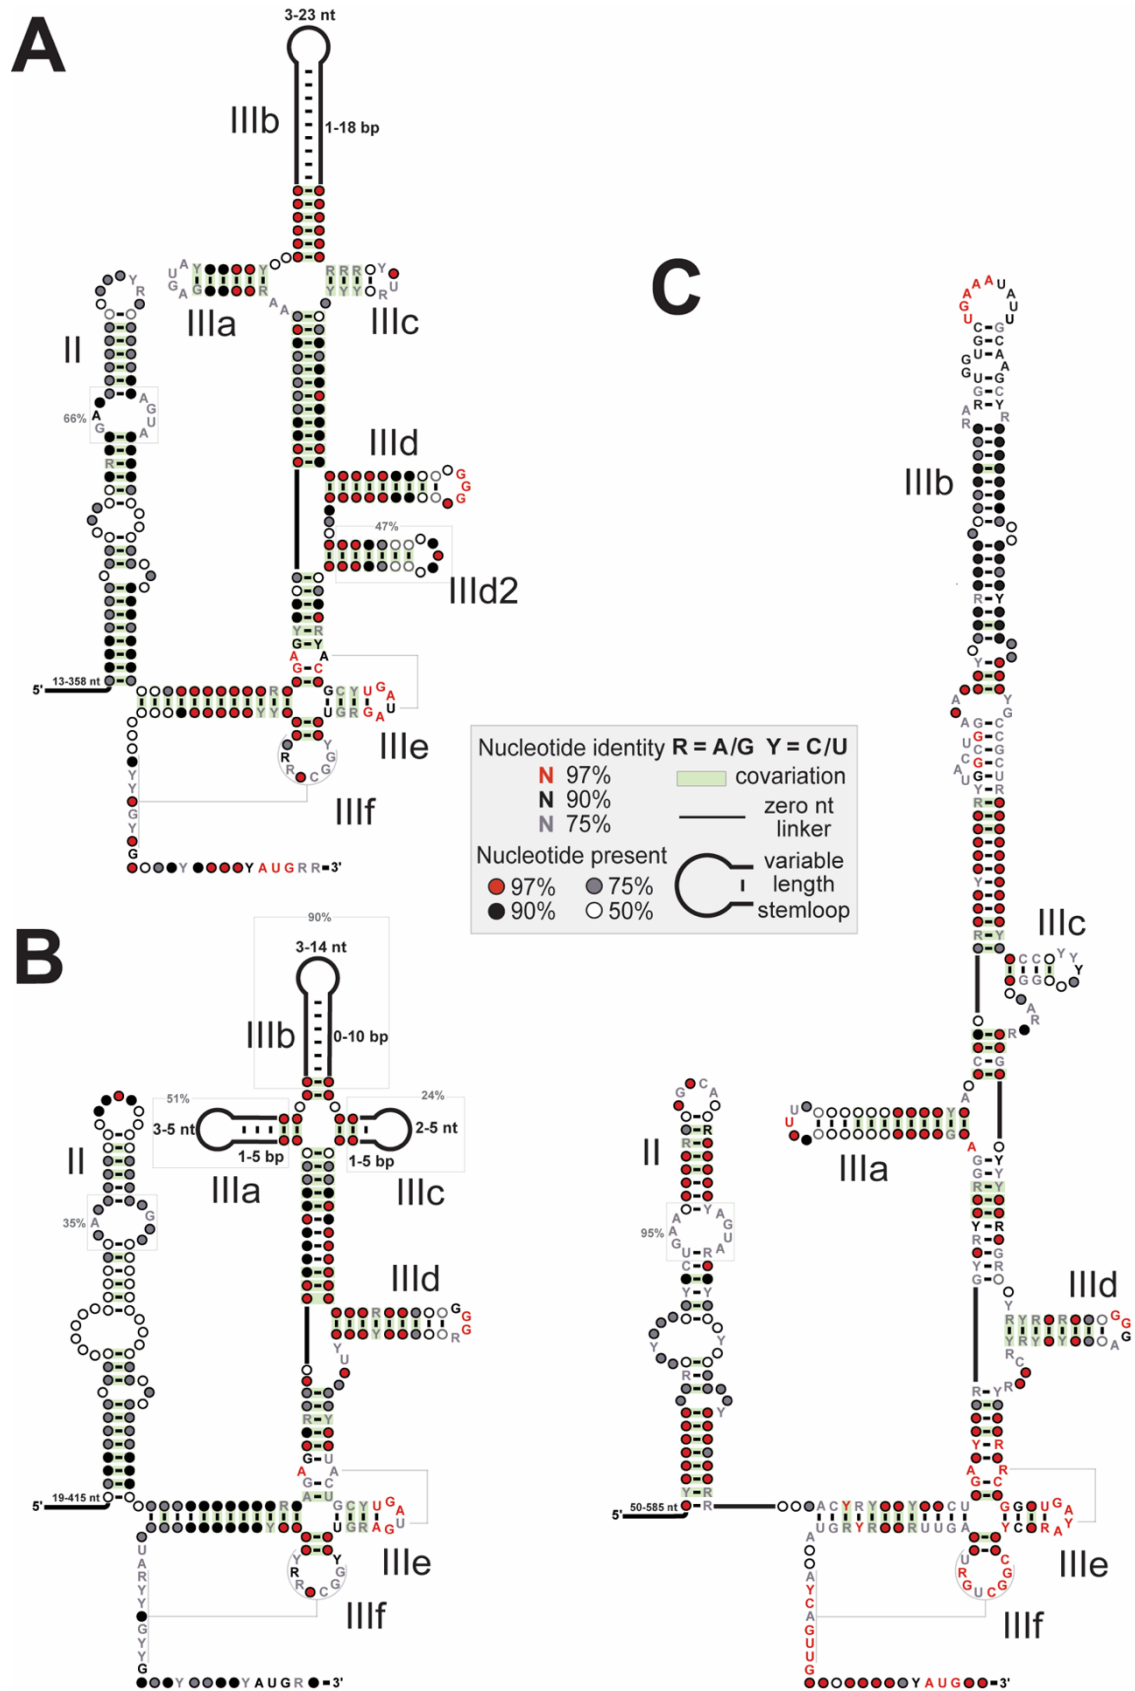

**Figure S5. Cluster consensus/covariation models.** Sequence and secondary structure consensus models for **(A)** Cluster 1 IRESs, **(B)** Cluster 2 IRESs, and **(C)** Cluster 3 IRESs, detailing conserved structure, as determined by statistically significant covariation, and sequence features. Models generated using R-scape (Rivas 2020; Weinberg and Breaker 2011).

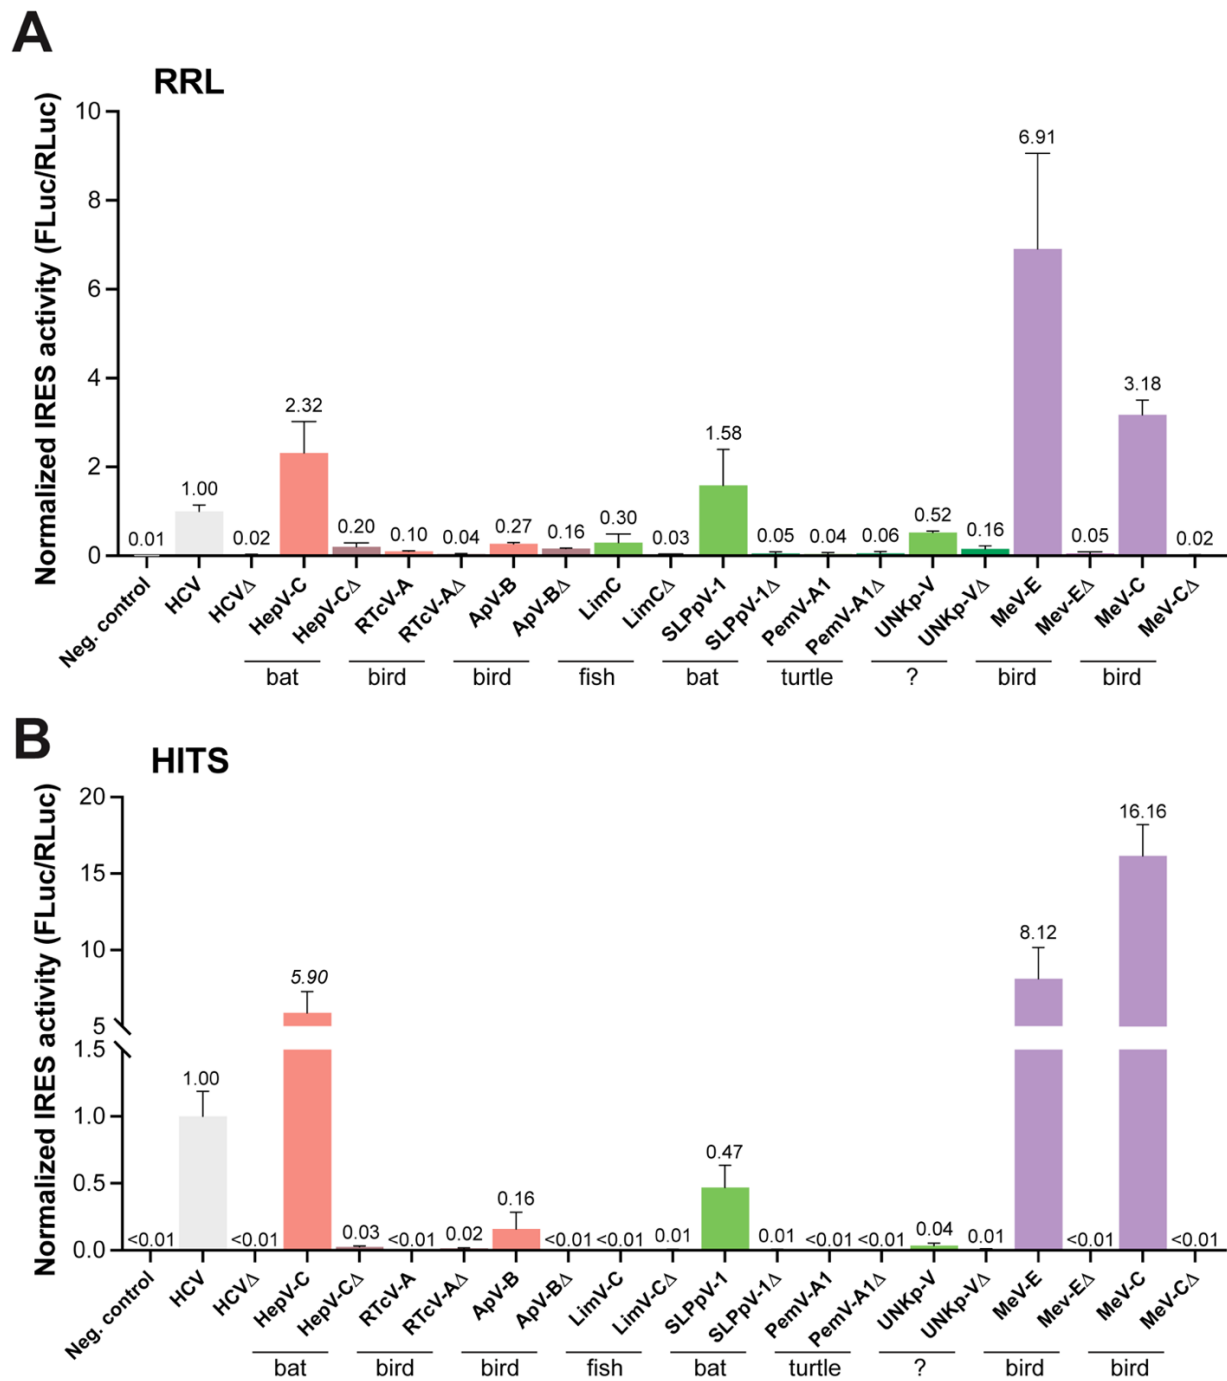

**Supplemental Figure S6. Functional data on putative IRESs in *in vitro* mammalian systems.** *In vitro* translation assays of IRES activity using dual luciferase constructs in rabbit reticulocyte lysate (RRL, **A**) and human *in vitro* translation system (HITS, **B**). Dual luciferase constructs are as described in Figure 2. The graph contains the results of translation assays of both wild-type and mutant ( $\Delta$ ) IRES sequences. Ratios were generated by FLuc signal /RLuc signal. Ratios were then normalized to wild type HCV IRES. The IRESs shown are as follows: hepatitis C (HepV-C), Ruddy turnstone calicivirus A (RTcV-A, MH453861:200-581), avocet picornavirus B MW14 (ApV-B, MH453809:95-458), limnipivirus C (LimV-C), sapelo-like bat picornavirus 1 (SLPpV-1, HQ595341:16-350), Pemapivirus A1 (PemV-A1, MG600106:394-713), picornaviridae sp. isolate wftcra74pic2 (UNKp-V, MT138373:249-558), megrivirus E (MeV-E), megrivirus C (MeV-C, HM751199:50-506). The color of the bars indicates the Cluster each IRES belongs to; pink for Cluster 1, green for cluster 2, purple for Cluster 3.

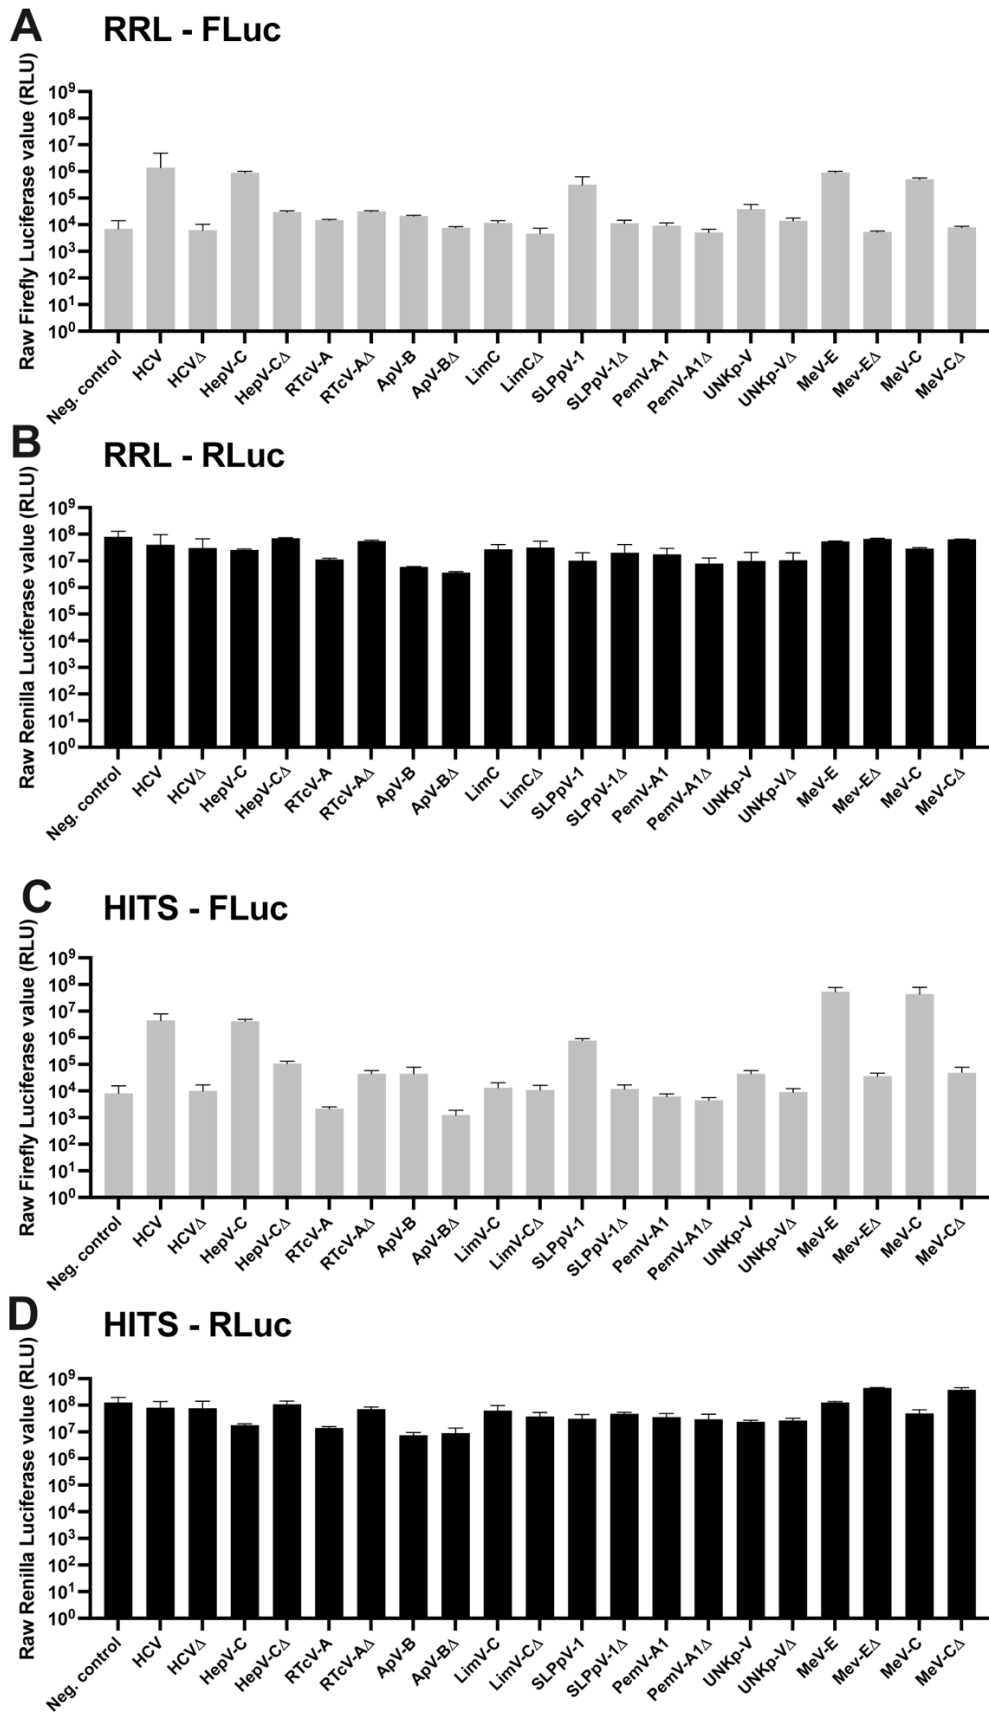

**Supplemental Figure S7. Raw luciferase values for in vitro translation assays. (A&C)** Raw Firefly and **(B&D)** *Renilla* luciferase values for each construct tested in the RRL and HITS systems. Virus names and genomic information of IRESs are as described above and in Figure 2.

| <b>Accession number</b> | <b>Genomic Coordinates</b> | <b>Reason dropped</b> |
|-------------------------|----------------------------|-----------------------|
| NC_021153               | 87-429                     | ambiguous SS          |
| MF352427                | 236-560                    | ambiguous SS          |
| NC_038314               | 237-576                    | ambiguous SS          |
| KY312542                | 37-275                     | ambiguous SS          |
| MH824542                | 39-356                     | ambiguous SS          |
| MT210612                | 145-541                    | ambiguous seq         |
| MT210615                | 6-342                      | ambiguous seq         |
| MT210611                | 95-491                     | ambiguous seq         |
| MT210606                | 11-335                     | ambiguous seq         |
| MT210613                | 71-397                     | ambiguous seq         |
| MT210607                | 168-491                    | ambiguous seq         |
| NC_012812               | 58-410                     | ambiguous seq         |

**Table S1. Sequences discarded from the covariation and clustering analysis.** Of the 176 putative IRESs identified, 13 were dropped from further analysis due to ambiguous secondary structure (ambiguous SS) or degenerate sequencing (ambiguous seq).

|           | <i>Flaviviridae</i> | <i>Picornaviridae</i> | <i>Caliciviridae</i> | <i>Picobirnaviridae</i> | <i>Unassigned</i> | <b>Total</b> |
|-----------|---------------------|-----------------------|----------------------|-------------------------|-------------------|--------------|
| Cluster 1 | 56                  | 35                    | 1                    | 1                       | -                 | 93           |
| Cluster 2 | 3                   | 33                    | -                    | -                       | 12                | 48           |
| Cluster 3 | -                   | 21                    | -                    | -                       | 1                 | 22           |

|           | <i>Mammalia</i> | <i>Aves</i> | <i>Reptilia</i> | <i>Aamphibia</i> | <i>Actinopteri</i> | <i>Insect</i> | <i>Unknown</i> | <b>Total</b> |
|-----------|-----------------|-------------|-----------------|------------------|--------------------|---------------|----------------|--------------|
| Cluster 1 | 81              | 9           | -               | -                | -                  | 1             | 2              | 93           |
| Cluster 2 | 23              | 14          | 5               | 1                | 5                  | -             | -              | 48           |
| Cluster 3 | -               | 21          | 1               | -                | -                  | -             | -              | 22           |

**Table S2. Taxonomic information on viral family and host class between Clusters.**

**Table S3. DNA oligonucleotide sequences used in this study.**

| DNA sequence                                                                                                                                                                                                                                                                                                                                                                                                                                                                                                                                                                                                                                                               | Description                                                                                                                                                                     |
|----------------------------------------------------------------------------------------------------------------------------------------------------------------------------------------------------------------------------------------------------------------------------------------------------------------------------------------------------------------------------------------------------------------------------------------------------------------------------------------------------------------------------------------------------------------------------------------------------------------------------------------------------------------------------|---------------------------------------------------------------------------------------------------------------------------------------------------------------------------------|
| <p>GGGCCCTACGGGCCCTACTCGAGCTAAAGCTTGGC<br/> AATCCGGTACTGTTGGTAAAGCCACCGCCAGCCCC<br/> CTGATGGGGGCGACACTCCACCATGAATCACTCCC<br/> CTGTGAGGAAGTACTGTCTTACGCAGAAAGCGTCT<br/> AGCCATGGCGTTAGTATGAGTGTCTGTCGAGCCTCC<br/> AGGACCCCCCTCCCGGGAGAGCCATAGTGGTCTG<br/> CGGAACCGGTGAGTACACCGGAATTGCCAGGACGA<br/> CCGGGTCCTTTCTTGGATAAACCCGCTCAATGCCTG<br/> GAGATTTGGGCGTGCCCCCGCAAGACTGCTAGCCG<br/> AGTAGTGTGGGTGCGCAAAGGCCTTGTGGTACTG<br/> CCTGATAGGGTGTGCGAGTGCCCCGGGAGGTCT<br/> CGTAGACCGTGCACCATGAGCACGAATCCTAAACC<br/> TCAAAGAAAACCAAACGTAACACCAGATCTGAGGC<br/> ACGGCATAAGC</p>                                                                                                      | <p>Gene block (dsDNA) fragment including the WT HCV IRES sequence with flanking restriction sites for cloning into pSGDLuc v3.0 to create dual luciferase reporter mRNAs</p>    |
| <p>GGGCCCTACTCGAGCTAAAGCTTGGCAATCCGGTA<br/> CTGTTGGTAAAGCCACCGACTAATTCCTATGTTTA<br/> TACGTTACTACCTTGTCTGAACGGTGGGCGCCACC<br/> CCGCCTAGTAGGATCCTGGCTTATCGTGTAGACCTC<br/> TAGGGACCACATTAGCTAGAGTGTAGGCTGCTATG<br/> GATGGAGTAGTGACCCCTTTTTGGGTATCACTCTCT<br/> AAGACTCCGGAATGTGTACATAGTACGCTGGAAATCC<br/> TACTTGTTCATGAGGGGGAGGTGGTGTGCTGAA<br/> ATATTGCAAGCCACCCCTCGGTTAAACAGTTTGGT<br/> GCCGCTTATGCCATATTACCGCCCCTTGTAGTTGGG<br/> CTGTTTTTGCAGCTCCGGGTTAGTAGAGTACCATAG<br/> TGGACGCGGTGTTGGGAATCACCGCCTTGGCTGCA<br/> CACTGCTTGATAGAGCTGCGGCTGGTCAAGCTAATT<br/> GTGGTATAACCAAGTTGATTTGGCATATGGATTCTAG<br/> ACTTACCTTCTTACAAGATTTTCTTAAGGAACATAGA<br/> TCTGAGGCACGGCATAAGC</p> | <p>Gene block (dsDNA) fragment including the WT MeV-E IRES sequence with flanking restriction sites for cloning into pSGDLuc v3.0 to create dual luciferase reporter mRNAs</p>  |
| <p>GGGCCCTACGGGCCCTACTCGAGCTAAAGCTTGGC<br/> AATCCGGTACTGTTGGTAAAGCCACCTCGTATGCTA<br/> TCTCCTTGAACAATTTTAAATCATTGCGAAGTGATCA<br/> TTGAAAAGGATAGGTGTTAAGAACTCAAAGAGTGT<br/> TAATAATGTTGGGTGACAGGTGTCCCCATAGAATTT<br/> ATTAACATGATTTGACTGGTTATCTAGTAAGAAGAA<br/> CCATCGAACGCACGAGCGAGCATTGCTTGCGGGGC<br/> AGTTACCCTGCGTCGATGTAAGTGTGTACCGGGGG<br/> GTGCACATGTTGATTCTTTATGGCCTGATAGGGTGC<br/> GTCATTGCGCCTAGATAATTAGTATAATGCGAATG<br/> GAATAAATTTACATGGCTTCTATAATTGAAAATTTGA<br/> CCACAACCTTTTGCATCATCAATGCTGGGAACAGCTG<br/> AGGATGCTGTCAGAAGATCTGAGGCACGGCATAAG<br/> C</p>                                                                                                    | <p>Gene block (dsDNA) fragment including the WT LimV-C IRES sequence with flanking restriction sites for cloning into pSGDLuc v3.0 to create dual luciferase reporter mRNAs</p> |
| <p>GGGCCCTACGGGCCCTACTCGAGCTAAAGCTTGGC<br/> AATCCGGTACTGTTGGTAAAGCCACCTCCTACAAAT<br/> GCACATGAAGAACAGTTTGTAGAGATTAACAAACGC</p>                                                                                                                                                                                                                                                                                                                                                                                                                                                                                                                                             | <p>Gene block (dsDNA) fragment including the HepV-C IRES sequence with flanking restriction sites for cloning into pSGDLuc</p>                                                  |

TTAGCTGAACCTAGGTGGTGAATCTAGTAGTAAGAT  
AAGTAGAGGAAGCTATACCTTAAGTTGGTTGGGCC  
TCGTGTTTGGCTCTATAAACAAAACCAAGTGAGTAGA  
GTGGATGAACAGTACTAAATCCCTGAGTACAGGGAA  
CCTCACAGGTGTGATACACTTATGTCTATGTGACCT  
GGTTGGAGGTTGGGCGTGCCCTATGATACTGGAGT  
GGGAGATCTTTTGGGGAACCCACGTTTTTCACTGC  
CTGATAGGGTCTTGCCGAGAGACTCACTTGTTCGG  
CTGTACTTGTAACATGGAGAATAAAAATAAAGGAATT  
TTTCAAACCTGTTGGAGAGAGTTTGGATGGAATTTG  
ACTTTGGCTGATAGAAGATCTGAGGCACGGCATAA  
GC

v3.0 to create dual luciferase reporter  
mRNAs

GGGCCCTACGGGCCCTACTCGAGCTAAAGCTTGGC  
AATCCGGTACTGTTGGTAAAGCCACCTCGTATGCTA  
TCTCCTTGAACAATTTTTAATCATTGCGAAGTGATCA  
TTGAAAAGGATAGGTGTTAAGAACTCAAAGAGTGT  
TAATAATGTTGGGTGACAGGTGTCCCATAGAATTT  
ATTAACATGATTTGGACTGGTTATCTAGTAAGAAGAA  
CCATCGAACGCACGAGCGAGCATTGCTTGCGGGGC  
AGTTACCCTGCGTCGATGTAAGTGTGTACCGCCCC  
GTGCACATGTTGATTCTTTATGGCCTGATAGGGTGC  
GTCATTGCGCCTAGATAATTAGTATAATGCGAATG  
GAATAAATTTACATGGCTTCTATAATTGAAAATTTGA  
CCACAACCTTTTGCATCATCAATGCTGGGAACAGCTG  
AGGATGCTGTCAGAAGATCTGAGGCACGGCATAAG  
C

Gene block (dsDNA) fragment including  
the LimV-C  $\Delta$ GGG IRES sequence with  
flanking restriction sites for cloning into  
pSGDLuc v3.0 to create dual luciferase  
reporter mRNAs

GGGCCCTACGGGCCCTACTCGAGCTAAAGCTTGGC  
AATCCGGTACTGTTGGTAAAGCCACCTCCTACAAAT  
GCACATGAAGAACAGTTTGTAGAGATTAACAAACGC  
TTAGCTGAACCTAGGTGGTGAATCTAGTAGTAAGAT  
AAGTAGAGGAAGCTATACCTTAAGTTGGTTGGGCC  
TCGTGTTTGGCTCTATAAACAAAACCAAGTGAGTAGA  
GTGGATGAACAGTACTAAATCCCTGAGTACAGGGAA  
CCTCACAGGTGTGATACACTTATGTCTATGTGACCT  
GGTTGGAGGTTGGGCGTGCCCTATGATACTGGAGT  
GGGAGATCTTTTCCCGAACCCACGTTTTTCACTGC  
CTGATAGGGTCTTGCCGAGAGACTCACTTGTTCGG  
CTGTACTTGTAACATGGAGAATAAAAATAAAGGAATT  
TTTCAAACCTGTTGGAGAGAGTTTGGATGGAATTTG  
ACTTTGGCTGATAGAAGATCTGAGGCACGGCATAA  
GC

Gene block (dsDNA) fragment including  
the HepV-C  $\Delta$ GGG IRES sequence with  
flanking restriction sites for cloning into  
pSGDLuc v3.0 to create dual luciferase  
reporter mRNAs

GGGCCCTACGGGCCCTACTCGAGCTAAAGCTTGGC  
AATCCGGTACTGTTGGTAAAGCCACCGGGAAATC  
TGGATCATGGGATTCCGCCTGCAGTACGGAAAAGT  
ACCGAGTACTTAGTATGTTCTGTAGTCCCCATGTG  
AAGGGACCGCCTGAGCTAGAGCTACGGGCTTGGAA  
GGTAAGGTAGGACGCCTTTTTGGCTATCCTACGATC  
GTCCGGCGCCGATTGCGTGGCCTCGTGCCCTCTC  
CGGTTCCGCCCCGATGATGCAGGATTTCCGCTAGG  
GGTTTGTGACGCCTCCAGGTACGTGAGGATGGGAA  
GCCTACCAATGCGTAGTGCTGGGTGACAGCCTGC

Gene block (dsDNA) fragment including  
the RTcV-A IRES sequence with flanking  
restriction sites for cloning into pSGDLuc  
v3.0 to create dual luciferase reporter  
mRNAs

CGGCTGGCGCAGTTCAGTGTGGTATAGCCAGTTGA  
TTACCGCCATGGCTTGCTTTTCGTTCAACTCTCTCAA  
CCCCAAAAACAACCTCTGCAAGAAGATCTGAGGCAC  
GGCATAAGC

GGGCCCTACGGGCCCTACTCGAGCTAAAGCTTGGC  
AATCCGGTACTGTTGGTAAAGCCACCGGGGAAATC  
TGGATCATGGGATTCCGCCTGCAGTACGGAAAAGT  
ACCGAGTACTTAGTATGTTCTGTAGTGCCCCATGTG  
AAGGGACCGCCTGAGCTAGAGCTACGGGCTTGGAA  
GGTAAGGTAGGACGCCTTTTTGGCTATCTACGATC  
GTCCGGCGCCGATTGCGTGGCCTCGTGCCCCTCTC  
CGTTCCGCCCCGATGATGCAGGATTTCCGCTAGG  
GGTTTGTGACGCCTCCAGGTACGTGAGGATCCCAA  
GCCTACCAATGCGTAGTGCTGGGTGACAGCCTGC  
CGGCTGGCGCAGTTCAGTGTGGTATAGCCAGTTGA  
TTACCGCCATGGCTTGCTTTTCGTTCAACTCTCTCAA  
CCCCAAAAACAACCTCTGCAAGAAGATCTGAGGCAC  
GGCATAAGC

Gene block (dsDNA) fragment including the RTcV-A  $\Delta$ GGG IRES sequence with flanking restriction sites for cloning into pSGDLuc v3.0 to create dual luciferase reporter mRNAs

GGGCCCTACGGGCCCTACTCGAGCTAAAGCTTGGC  
AATCCGGTACTGTTGGTAAAGCCACCGAATTCAGGA  
ATTCTGGAAGTGGGGACTTCGCCCAAGCTGTGAA  
CCGGATTACCGATGTAGCTCCTTGGGTGCCTCAGG  
GAAGGGACCAGTAGTTCTAGAGCACATGTGAAGCA  
CTGACAAGGGGACTGCGTTGCATATCCCCGACCCC  
GGACTCTGTGTGATGATGCTGGATTGCCGCTAGCA  
CAGAGAAACCACCCTTTTAGGGCTCGCAGGGCAGT  
GTGTAGCACCTAGTTTGGGAAAGCTAGGCTGGTGT  
GTAAGTGGATGATAGTCTCGCGGCGGATCGAGTTCT  
ACTGGTATAATCCGTTGTATCTTATCATGGATTCTCG  
CTACCTGACCTCTGATGTAAGTGAAGTCAAGCTA  
CAGAAGATCTGAGGCACGGCATAAGC

Gene block (dsDNA) fragment including the ApV-B  $\Delta$ GGG IRES sequence with flanking restriction sites for cloning into pSGDLuc v3.0 to create dual luciferase reporter mRNAs

GGGCCCTACGGGCCCTACTCGAGCTAAAGCTTGGC  
AATCCGGTACTGTTGGTAAAGCCACCGAATTCAGGA  
ATTCTGGAAGTGGGGACTTCGCCCAAGCTGTGAA  
CCGGATTACCGATGTAGCTCCTTGGGTGCCTCAGG  
GAAGGGACCAGTAGTTCTAGAGCACATGTGAAGCA  
CTGACAAGGGGACTGCGTTGCATATCCCCGACCCC  
GGACTCTGTGTGATGATGCTGGATTGCCGCTAGCA  
CAGAGAAACCACCCTTTTAGGGCTCGCAGGGCAGT  
GTGTAGCACCTAGTTTCCCAAAGCTAGGCTGGTGT  
GTAAGTGGATGATAGTCTCGCGGCGGATCGAGTTCT  
ACTGGTATAATCCGTTGTATCTTATCATGGATTCTCG  
CTACCTGACCTCTGATGTAAGTGAAGTCAAGCTA  
CAGAAGATCTGAGGCACGGCATAAGC

Gene block (dsDNA) fragment including the ApV-B  $\Delta$ GGG IRES sequence with flanking restriction sites for cloning into pSGDLuc v3.0 to create dual luciferase reporter mRNAs

GGGCCCTACGGGCCCTACTCGAGCTAAAGCTTGGC  
AATCCGGTACTGTTGGTAAAGCCACCGGAATAACG  
GCAATTGTTTGTATGTGGGAGGTCAAGCCTGCCTAG  
CCGATAACCTTTGACCGGGTGTGTAGGATAGAACA  
GGAACCCACTACAGGCGACAGGTTATGGTAGAGTG  
GATACCTAGCCAGGGGCAATGGGACTGCGTTGCAT

Gene block (dsDNA) fragment including the SLpV-1 IRES sequence with flanking restriction sites for cloning into pSGDLuc v3.0 to create dual luciferase reporter mRNAs

ATCCCTAATGAGCCATCGAGATTTCTCTGGCCATTA  
CCCGGTGATGGTTGTGTGGGGGGGGCCCCACACA  
CTAGATCCATACTGCCTGATAGGGTTCGCGGCTGGC  
CGACCATAACCTGTATAGTCAGTTGACTTTGAATCA  
TGGTTTTCTTCTTCAACTCCAACAAGACTACTGAGA  
CTGCCCAAAGAAGATCTGAGGCACGGCATAAGC

GGGCCCTACGGGCCCTACTCGAGCTAAAGCTTGGC  
AATCCGGTACTGTTGGTAAAGCCACCGGAATAACG  
GCAATTGTTTGTATGTGGGAGGTCAAGCCTGCCTAG  
CCGATAACCTTTGACCGGGTGTGTAGGATAGAACA  
GGAACCCACTACAGGCGACAGGTTATGGTAGAGTG  
GATACCTAGCCAGGGGCAATGGGACTGCGTTGCAT  
ATCCCTAATGAGCCATCGAGATTTCTCTGGCCATTA  
CCCGGTGATGGTTGTGTGGGGGGGGCCCCACACAC  
TAGATCCATACTGCCTGATAGGGTTCGCGGCTGGCC  
GACCATAACCTGTATAGTCAGTTGACTTTGAATCAT  
GGTTTTCTTCTTCAACTCCAACAAGACTACTGAGAC  
TGCCCAA AGAAGATCTGAGGCACGGCATAAGC

Gene block (dsDNA) fragment including the SLpV-1  $\Delta$ GGG IRES sequence with flanking restriction sites for cloning into pSGDLuc v3.0 to create dual luciferase reporter mRNAs

GGGCCCTACGGGCCCTACTCGAGCTAAAGCTTGGC  
AATCCGGTACTGTTGGTAAAGCCACCGTAGAAATC  
GCAATCTTATGTCATAGGGAACCCGTGGCCGATAAC  
CGGTAACCAATCCGGTGTGTAGGACACGGAGTAAA  
CTAACACTCTATGGTAAACATAAGGACTGATGCGAG  
AAGAGCAGAAGCTGTAGACTCGTTTGGGACCCAATT  
TGGTATCCCTTGCCTAGTAGCGCGAGCTATGGACT  
CCGGGCTCCACTCCCGGATTTGATTCTGACTTTCCT  
GATAGGGACGCGGATGGCCGTCTCGCATTAGTATA  
GTCATTTGCAACTTACATGGACTCTAATACTATTTCA  
AATGTAACCAACAAAACATACTGAGAAGATCTGAG  
GCACGGCATAAGC

Gene block (dsDNA) fragment including the PemV-A1  $\Delta$ GGG IRES sequence with flanking restriction sites for cloning into pSGDLuc v3.0 to create dual luciferase reporter mRNAs

GGGCCCTACGGGCCCTACTCGAGCTAAAGCTTGGC  
AATCCGGTACTGTTGGTAAAGCCACCAAAGGTAAAA  
GGGTAGATTGCTACCACTTATGGCATGTGAACTGGA  
TTACCAATGTAGCATGGACCCTCTAGGTGGGGAAT  
GGCAATCGACTATCCTAGCTAGATTGGACCACTCAT  
GGGCTTTGGGCGCGAATTACGCAGAACCTACCGAC  
AACATGTCTGGAAACCCCATGAGTGGAGGGGAATT  
GGGAAAACCCCTTTGATCCAAACTGCCTGATAGGGT  
CGCGGCTGGCCGAGTTAGGATTAGTAGTCAGTAGA  
ATTTAACATGGAACTCTTGGTAACGTTGTGATGAAT  
GAAGTAACAGAAGCTAGAAGATCTGAGGCACGGCA  
TAAGC

Gene block (dsDNA) fragment including the UNKp-V IRES sequence with flanking restriction sites for cloning into pSGDLuc v3.0 to create dual luciferase reporter mRNAs

GGGCCCTACGGGCCCTACTCGAGCTAAAGCTTGGC  
AATCCGGTACTGTTGGTAAAGCCACCACTCTCTC  
CACAAGTAGGCGCCGTGGAGTTCATGCTCGTTCTG  
AACCGGGAATGGCACAACCCGTAGTAGGATCTTGC  
CTCTGCCACGTGCACCTGCGCCTGTTGCTTCTAGA  
CTATGGGCTGCTAAGGATGATCACAGACTCCTTTTT  
GGACAATCTGTGTCAAGTCTACTGTTACATCTGATG  
TACGCTGGAAATCCTCGTACTGGAGGCAATACCTG

Gene block (dsDNA) fragment including the MeV-C IRES sequence with flanking restriction sites for cloning into pSGDLuc v3.0 to create dual luciferase reporter mRNAs

GAGGTGGTGCTGAAATATTGCAAGCCACAGGTGTG  
TTTCTAGTCTTGGTGCCGCTATCAGATGTCGCACCC  
TCTACGGGCAAATGTAGAACCCTTAGTGGACGCGTG  
AGATGGGAATCCACGCCTGGCCATAGACTGGCTGA  
TAAGCTCGCGGCTGATCGAGTTGCAACAGTAATCA  
GTTGATTTGCCACTATGTCGTACAAACCTGAAGATA  
ATGCTCCACTCCAGTCTCAACAAAGAAGATCTGAGG  
CACGGCATAAGC

GGGCCCTACGGGCCCTACTCGAGCTAAAGCTTGGC  
AATCCGGTACTGTTGGTAAAGCCACCACACTCTCTC  
CACAAGTAGGCGCCGTGGAGTTCATGCTCGTTCTG  
AACCGGGAATGGCACAACCCGTAGTAGGATCTTGC  
CTCTGCCACGTGCACCTGCGCCTGTTGCTTCTAGA  
CTATGGGCTGCTAAGGATGATCACAGACTCCTTTTT  
GGACAATCTGTGTCAAGTCTACTGTTACATCTGATG  
TACGCTGGAAATCCTCGTACTGGAGGCAATACCTG  
GAGGTGGTGCTGAAATATTGCAAGCCACAGGTGTG  
TTTCTAGTCTTGGTGCCGCTATCAGATGTCGCACCC  
TCTACGGGCAAATGTAGAACCCTTAGTGGACGCGTG  
AGATCCCAATCCACGCCTGGCCATAGACTGGCTGA  
TAAGCTCGCGGCTGATCGAGTTGCAACAGTAATCA  
GTTGATTTGCCACTATGTCGTACAAACCTGAAGATA  
ATGCTCCACTCCAGTCTCAACAAAGAAGATCTGAGG  
CACGGCATAAGC

Gene block (dsDNA) fragment including the MeV-C  $\Delta$ GGG IRES sequence with flanking restriction sites for cloning into pSGDLuc v3.0 to create dual luciferase reporter mRNAs

GCTAGCCGAGTAGTGTTCCCTCGCGAAAGGCCTTG  
TG

Forward ssDNA primer to introduce the  $\Delta$ GGG into the HCV IRES sequence within pSGDLuc v3.0 via Q5 site-directed mutagenesis

AGTCTTGCGGGGGCACGC

Forward ssDNA primer to introduce the  $\Delta$ GGG into the HCV IRES sequence within pSGDLuc v3.0 via Q5 site-directed mutagenesis

TAATACGACTCACTATAGGACTAATTCCTATGTTTAT  
ACGTTACTACCTTGTTCTG

Forward ssDNA primer to introduce the  $\Delta$ GGG into the MeV-E IRES sequence within pSGDLuc v3.0 via Q5 site-directed mutagenesis

GTAAGAAGGTAAGTCTAGAATCCATATGCCAAATC

Reverse ssDNA primer to introduce the  $\Delta$ GGG into the MeV-E IRES sequence within pSGDLuc v3.0 via Q5 site-directed mutagenesis

TAATACGACTCACTATAGGACTAATTCCTATGTTTAT  
ACGTTACTACCTTGTTCTG

Forward ssDNA primer to amplify MegE-V IRES templates for transcription of RNAs for SHAPE-MaP

GTAAGAAGGTAAGTCTAGAATCCATATGCCAAATC

Reverse ssDNA primer to amplify MegE-V IRES templates for transcription of RNAs for SHAPE-MaP

|                                                          |                                                                                                                                                      |
|----------------------------------------------------------|------------------------------------------------------------------------------------------------------------------------------------------------------|
| TAATACGACTCACTATAGGCTCCTACAAATGCACAT<br>GAAGAACAGTTTGTAG | Forward ssDNA primer to amplify HepV-C IRES templates for transcription of RNAs for SHAPE-MaP                                                        |
| AAGTCAAATTCATCCAACTCTCTCCAAC                             | Reverse ssDNA primer to amplify HepV-C IRES templates for transcription of RNAs for SHAPE-MaP                                                        |
| TAATACGACTCACTATAGGGTTTCTGAGCACTGGTA<br>AGAGCTTAGAC      | Forward ssDNA primer to amplify LimV-C IRES templates for transcription of RNAs for SHAPE-MaP                                                        |
| TGATGATGCAAAGTTGTGGTCAAATTTCAATTATA<br>G                 | Reverse ssDNA primer to amplify LimV-C IRES templates for transcription of RNAs for SHAPE-MaP                                                        |
| GCTATGGACTGGGGGCTCCACTC                                  | Forward ssDNA primer to introduce the wild type GGG into the PemV-A1 $\Delta$ GGG IRES sequence within pSGDLuc v3.0 via Q5 site-directed mutagenesis |
| TCGCGCTACTAGGCA                                          | Reverse ssDNA primer to introduce the wild type GGG into the PemV-A1 $\Delta$ GGG IRES sequence within pSGDLuc v3.0 via Q5 site-directed mutagenesis |
| GAGGGGAATTCCCAAACCCCTTTGATC                              | Forward ssDNA primer to introduce the $\Delta$ GGG into the UNKp-V IRES sequence within pSGDLuc v3.0 via Q5 site-directed mutagenesis                |
| CACTCATGGGGTTTCCAG                                       | Forward ssDNA primer to introduce the $\Delta$ GGG into the UNKp-V IRES sequence within pSGDLuc v3.0 via Q5 site-directed mutagenesis                |
